# Supplementary material for: VvJAZ13 Positively Regulates Cold Tolerance in Arabidopsis and Grape
Source: MDPI journal article supplement (doi:10.3390/ijms25084458), 2024-04-18
Supplement: s1 [file s1]

**Table S1.** Primers sequence.

| <b>Primer name</b> | <b>primer sequence (5'→3')</b>                     | <b>application</b>         |
|--------------------|----------------------------------------------------|----------------------------|
| <i>VvJAZ13</i> -F  | tttgagaggacacgctcgagATGACATGCAGTCTGGAAGGAAA        | pART-CAM- <i>VvJAZ13</i> - |
| <i>VvJAZ13</i> -R  | gcccttgctcaccatgaattcCTTTGGAGATTTGGCAGCCA          | EGFP                       |
| <i>VvJAZ13</i> -F  | aggccgaattcccggggatccttATGACATGCAGTCTGGAAGGAAA     | pGBKT7-                    |
| <i>VvJAZ13</i> -R  | ccgctgcaggtcgacggatccTACTTTGGAGATTTGGCAGCC         | <i>VvJAZ13</i>             |
| <i>VvJAZ13</i> -F  | CCGAATCGCTCCGCCAGAC                                | qRT-PCR                    |
| <i>VvJAZ13</i> -R  | GCCGGAACCCCCAGCAGATC                               | qRT-PCR                    |
| <i>VvCBF1</i> -F   | AACCCAACTGCACCATCTTC                               | qRT-PCR                    |
| <i>VvCBF1</i> -R   | CATCATCCCAGCTGAATCCT                               | qRT-PCR                    |
| <i>VvCBF2</i> -F   | ATGGACTTGGACCGTGAGTC                               | qRT-PCR                    |
| <i>VvCBF2</i> -R   | ATCGGGAAAATTGAGGGAAG                               | qRT-PCR                    |
| <i>VvCBF3</i> -F   | CCCTCATCCTCCTCTTCCTC                               | qRT-PCR                    |
| <i>VvCBF3</i> -R   | TCCCCAGCTGAAGATGACTT                               | qRT-PCR                    |
| <i>VvICE1a</i> -F  | GCAATGCCGGTCAGAATCAC                               | qRT-PCR                    |
| <i>VvICE1a</i> -R  | AACACGAAGACGACGAGTCC                               | qRT-PCR                    |
| <i>VvICE1b</i> -F  | CCAGCAAGGGTGGAGGTAAG                               | qRT-PCR                    |
| <i>VvICE1b</i> -R  | AGCCTGCTGGATGTCCAATC                               | qRT-PCR                    |
| <i>VvICE1c</i> -F  | TGTCTCAGAGTCAGAGCGGA                               | qRT-PCR                    |
| <i>VvICE1c</i> -R  | ACCCACAAACCATCGAGGAC                               | qRT-PCR                    |
| <i>VvF-box</i> -F  | tttgagaggacacgctcgagATGATAGAACTGAAGAAGTCCAGTCTAA   | pGADT7-                    |
| <i>VvF-box</i> -R  | gcccttgctcaccatgaattcAAAAGTAGGCAAGTAGTCGTCGTCT     | <i>VvF-box</i>             |
| <i>VvTIFY5A</i> -F | gtgggcatcgatacgggacatcttATGGAGTTTACCCCCAATCTAAGA   | pGADT7-                    |
| <i>VvTIFY5A</i> -R | cagctcgagctcgatggatccTTAATGATTGTATGGGGACATAGCTT    | <i>VvTIFY5A</i>            |
| <i>VvAGD13</i> -F  | gtgggcatcgatacgggacatcttATGGCGACAGGAATTTTCGG       | pGADT7-                    |
| <i>VvAGD13</i> -R  | cagctcgagctcgatggatccTCATGAAGAGTCAGATGATTTAATTCTTC | <i>VvAGD13</i>             |
| <i>VvTIFY9</i> -F  | tttgagaggacacgctcgagATGGAGAATTTGTTGGGTCTTCTC       | pGADT7-                    |
| <i>VvTIFY9</i> -R  | gcccttgctcaccatgaattcAAACAGTCCCCTGCAGCCTG          | <i>VvTIFY9</i>             |
| <i>Vvbch1</i> -F   | gtgggcatcgatacgggacatcttATGTCGAGAGCCGCCATGG        | pGADT7-                    |
| <i>Vvbch1</i> -R   | cagctcgagctcgatggatccCTAGGCCCGGAACAGCTCC           | <i>Vvbch1</i>              |
| <i>PGADT7</i> -F   | GGAGTACCCATAGGACGTACC                              | pGADT7                     |
| <i>PGADT7</i> -R   | TATCTACGATTCTZTCTGCAGC                             | pGADT7                     |
| <i>AtCBF1</i> -F   | GAGACGATGGTGGAAAGCTATTT                            | qRT-PCR                    |
| <i>AtCBF1</i> -R   | AGCATGCCTTCAGCCATATTA                              | qRT-PCR                    |
| <i>AtCBF2</i> -F   | GACCTTGGTGGAGGCTATTT                               | qRT-PCR                    |
| <i>AtCBF2</i> -R   | ATCCCTTCGGCCATGTTATC                               | qRT-PCR                    |
| <i>AtCBF3</i> -F   | GACGTTGGTGGAGGCTATTT                               | qRT-PCR                    |
| <i>AtCBF3</i> -R   | AGCATCCCTTCTGCCATATTAG                             | qRT-PCR                    |
| <i>AtICE1</i> -F   | CTTCCATCCGTTGACACCTAC                              | qRT-PCR                    |
| <i>AtICE1</i> -R   | CTCTAGCTTGCTGGCCTTTAG                              | qRT-PCR                    |
| <i>EGFP</i> -F     | ACTATCCTTCGCAAGACC                                 | positive identification    |
| <i>EGFP</i> -R     | GGTCAGCTTGCCGTAGGT                                 |                            |

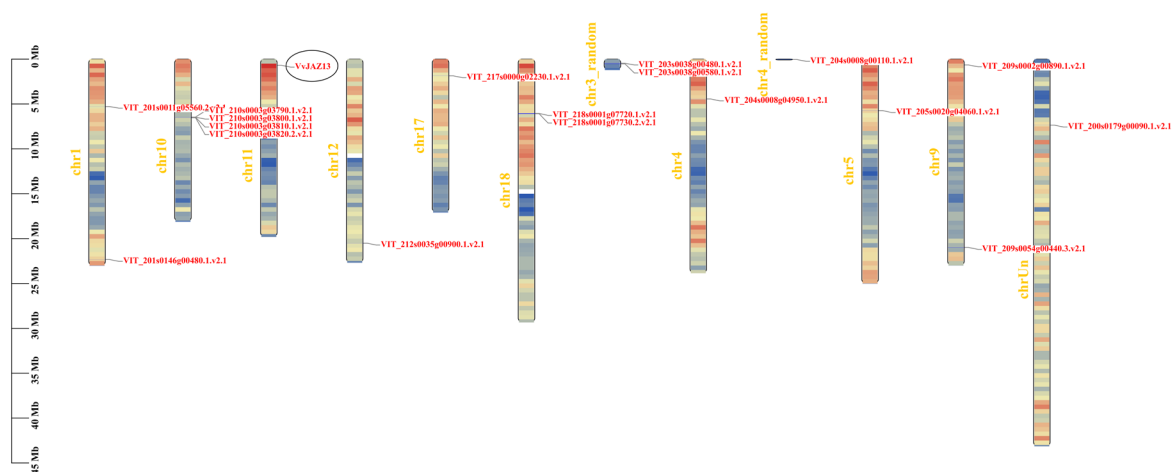

**Figure S1.** Chromosomal localization analysis of *VvJAZ13* gene in grape.

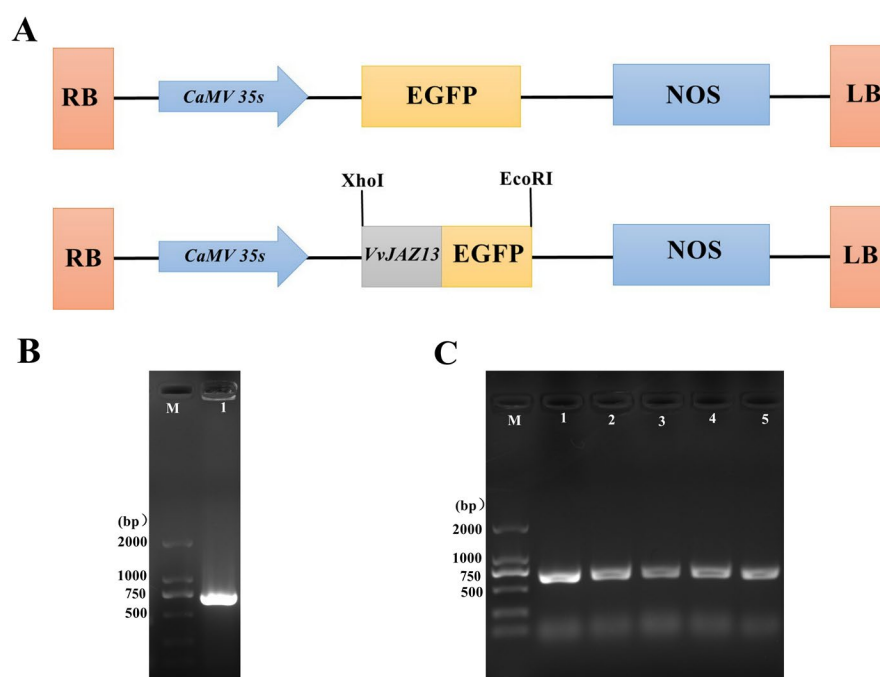

**Figure S2.** Cloning of *VvJAZ13* gene. (A) Empty plasmid and *VvJAZ13*-EGFP plasmid map. (B) Gene clone of *VvJAZ13*. (C) PCR detection of *Escherichia coli*. (C) PCR detection of *Agrobacterium*.

Note: M is DL 2000 Marker, 1Mel 5 is positive PCR products.

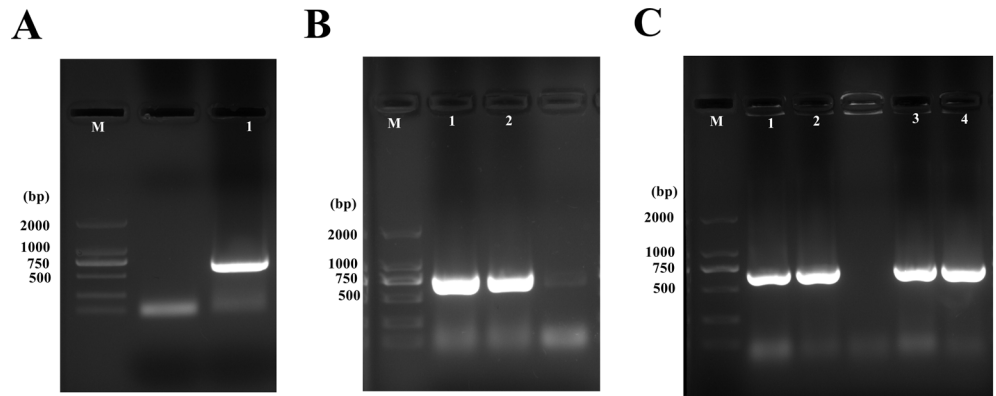

**Figure S3.** Cloning of *VvJAZ13* gene and construction of pGBKT7-*VvJAZ13* vector. (A) Gene clone of *VvJAZ13*. (B) PCR detection of *Escherichia coli*. (C) PCR detection of Y2H gold.

Note: M is DL 2000 Marker, 1Mel 5 is positive PCR products.

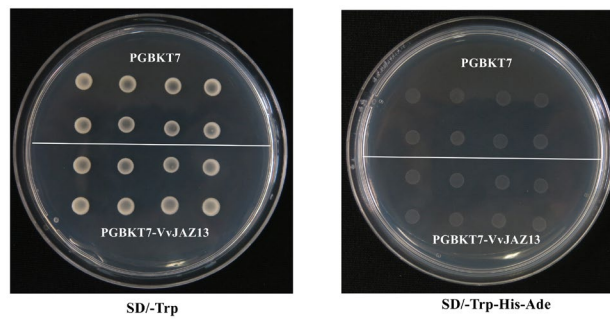

**Figure S4.** Transcriptional activation assays of *VvJAZ13*.

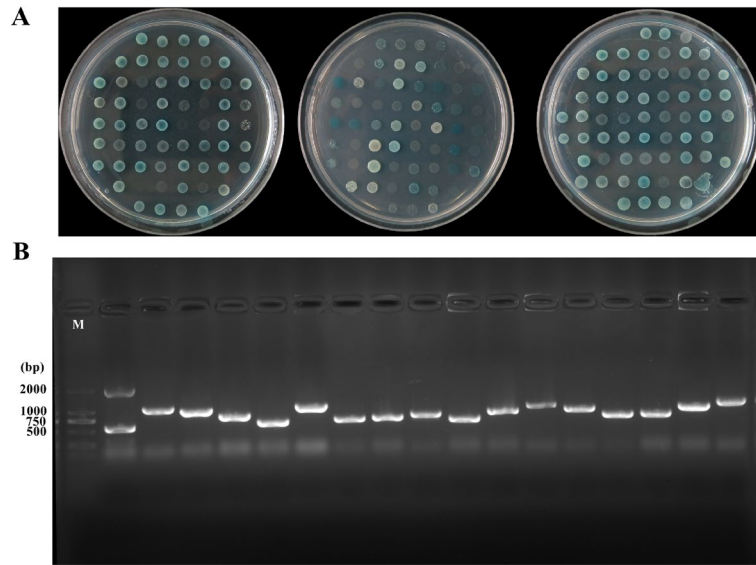

**Figure S5.** Screening of VvJAZ13-BD libraries. (A) VvJAZ13-BD partial library screening of cyanobacteria. (B) PCR detection plot.

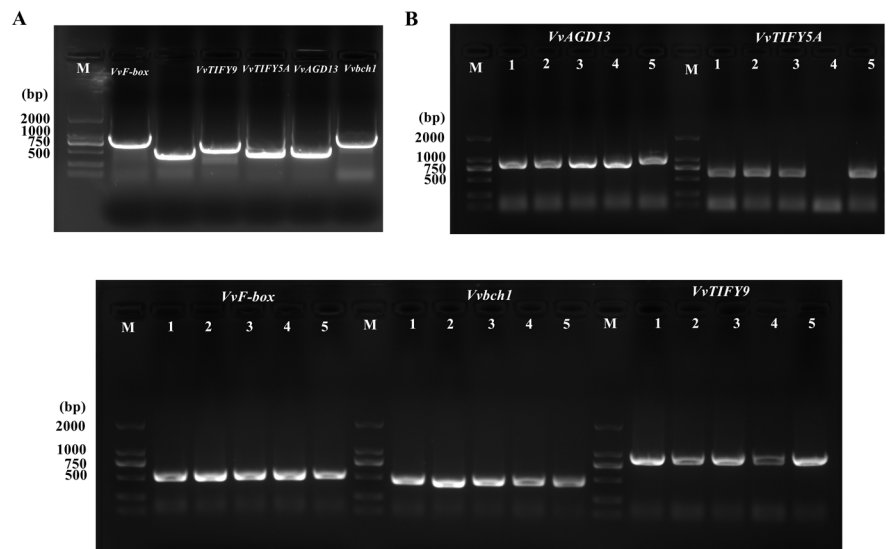

**Figure S6.** Cloning of VvJAZ13 potential interacting proteins and construction of vectors.

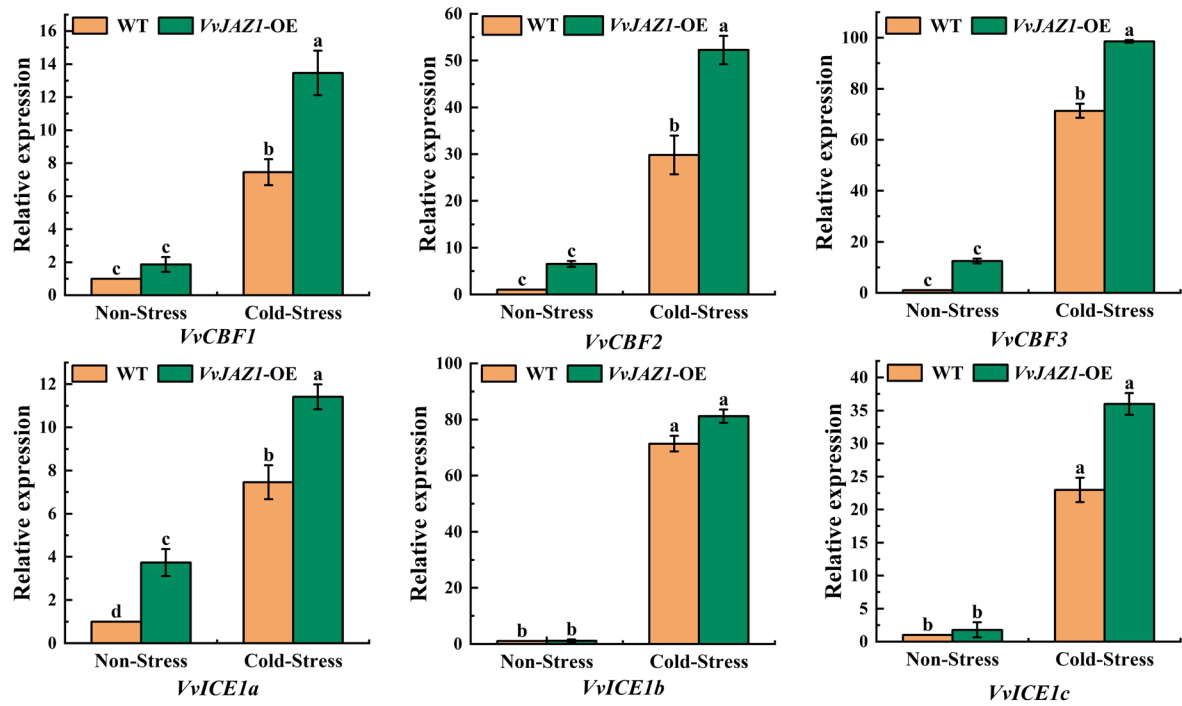

**Figure S7.** Expression of cold response gene *VvCBF1*, *VvCBF2*, *VvCBF3*, *VvICE1a*, *VvICE1b* and *VvICE1c* in transient transformation of *VvJAZ1* grape leaves.

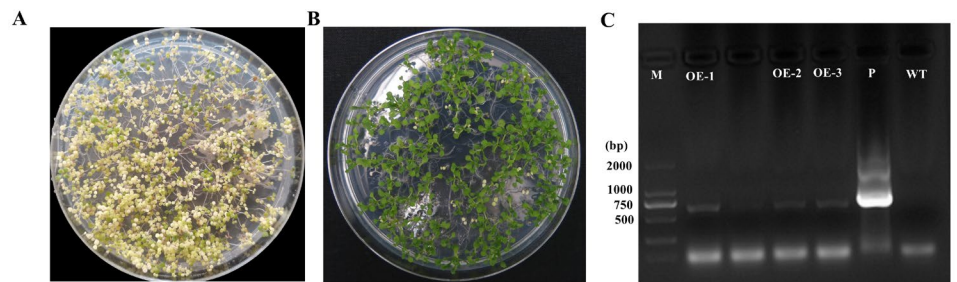

**Figure S8.** Identification of *VvJAZ13* transgenic *Arabidopsis*. (A) Screening of *T<sub>0</sub>* *Arabidopsis* seeds in MS medium containing Kana resistance. (B) Screening of *T<sub>2</sub>* homozygous *Arabidopsis* seeds in MS medium containing Kana resistance. (C) The positive detection of *Arabidopsis*.
